# Supplementary material for: Structure–function study of peroxidase-like G-quadruplex-hemin complexes
Source: Royal Society of Chemistry journal article supplement (doi:10.1039/b920293e), 2009-12-09
Supplement: b920293e.pdf [file b920293e.pdf]

## Structure-function study of peroxidase-like G-quadruplex-hemin complexes

De-Ming Kong,\* Wei Yang, Jing Wu, Chen-Xi Li and Han-Xi Shen

### 1. Detection of peroxidase activity of $G_2T_n$ and $G_3T_n$ by following the absorption intensity of the reaction mixture at $\lambda = 414$ nm

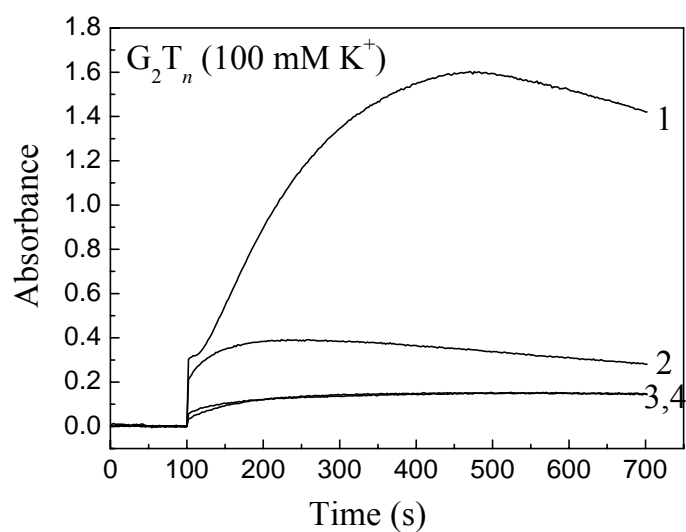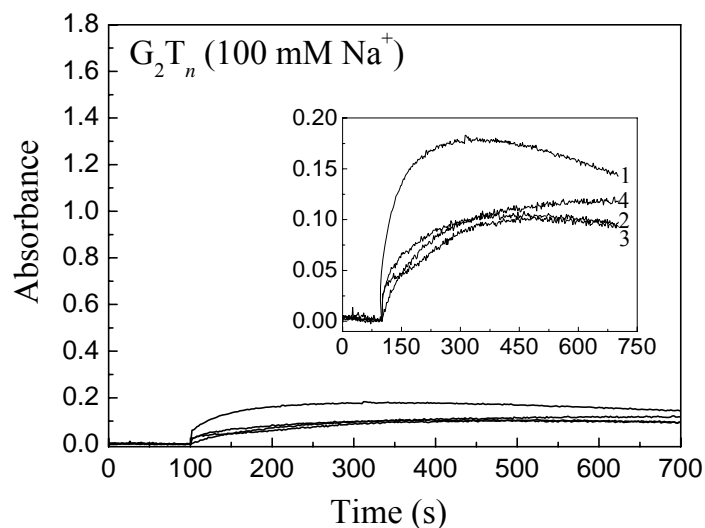

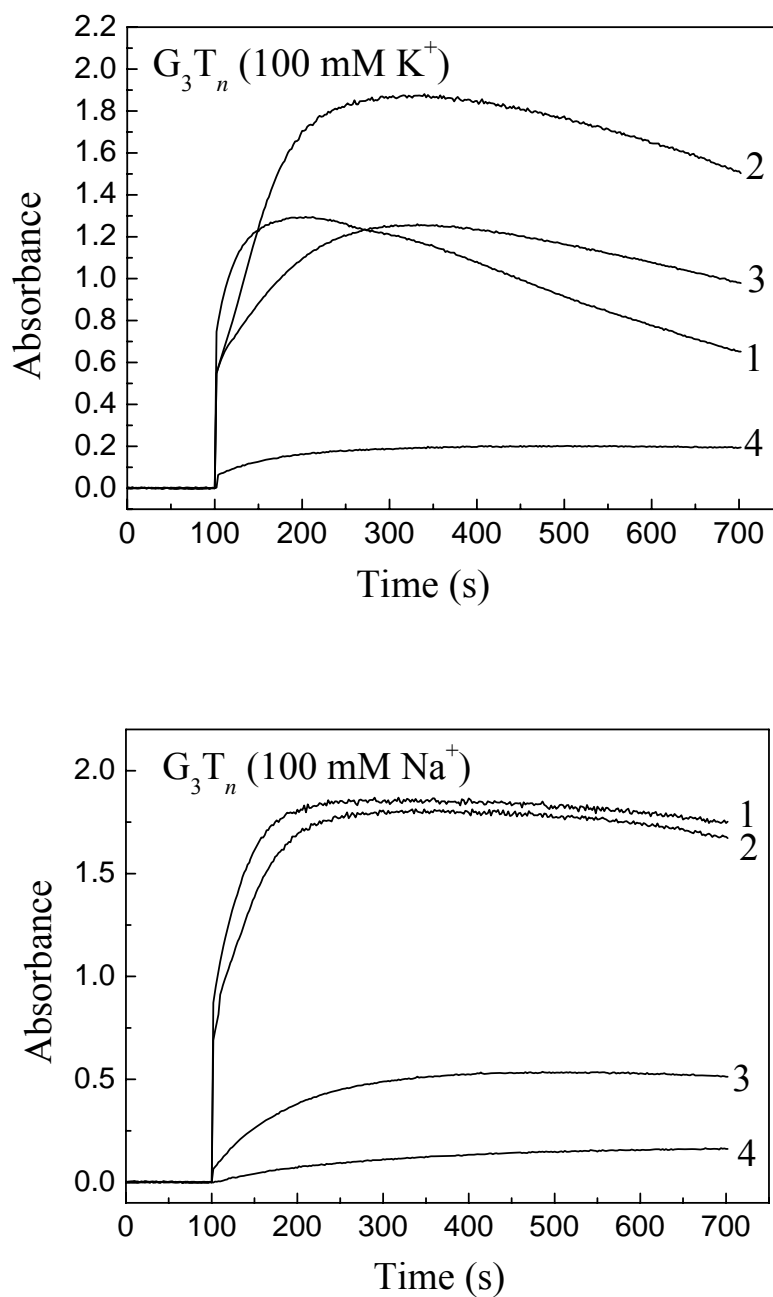

**Fig. S1** Absorbance signal versus reaction time plots for the oxidative reaction of ABTS by  $H_2O_2$  in the presence of hemin and the oligonucleotides with the sequence of  $d(G_2T_n)_3G_2$  or  $d(G_3T_n)_3G_3$  under different ionic conditions. The numbers labeled on the plots represent the values of  $n$ .

## 2. Thermal denaturation study of $G_2T_n$ and $G_3T_n$

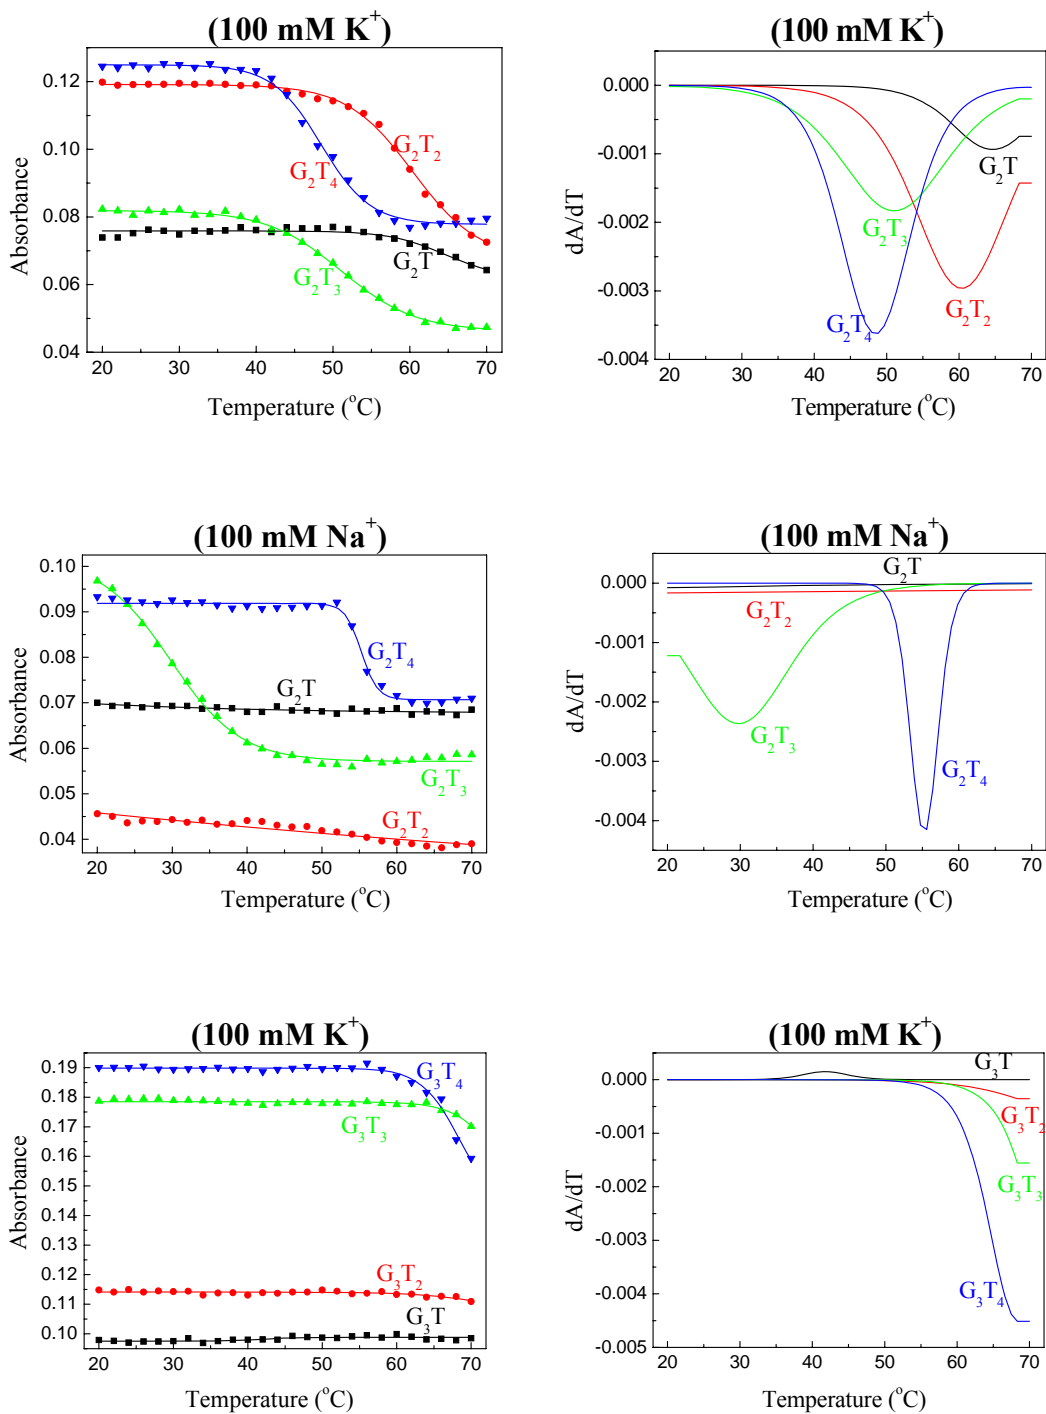

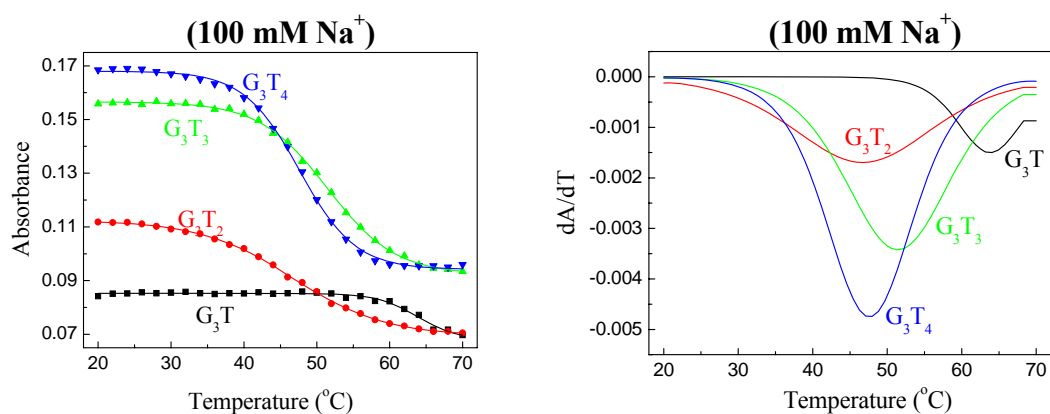

**Fig. S2** Melting temperature ( $T_m$ ) detection for the oligonucleotides with the sequence of  $d(G_2T_n)_3G_2$  or  $d(G_3T_n)_3G_3$ . **(Left)** Denaturation profiles obtained by recording the absorbance change at 295 nm as a function of temperature. **(Right)** First derivative of the denaturation profiles.

### 3. CD spectra of the oligonucleotides with the sequence of $dG_3T_iG_3T_jG_3T_kG_3$ in the absence or presence of hemin

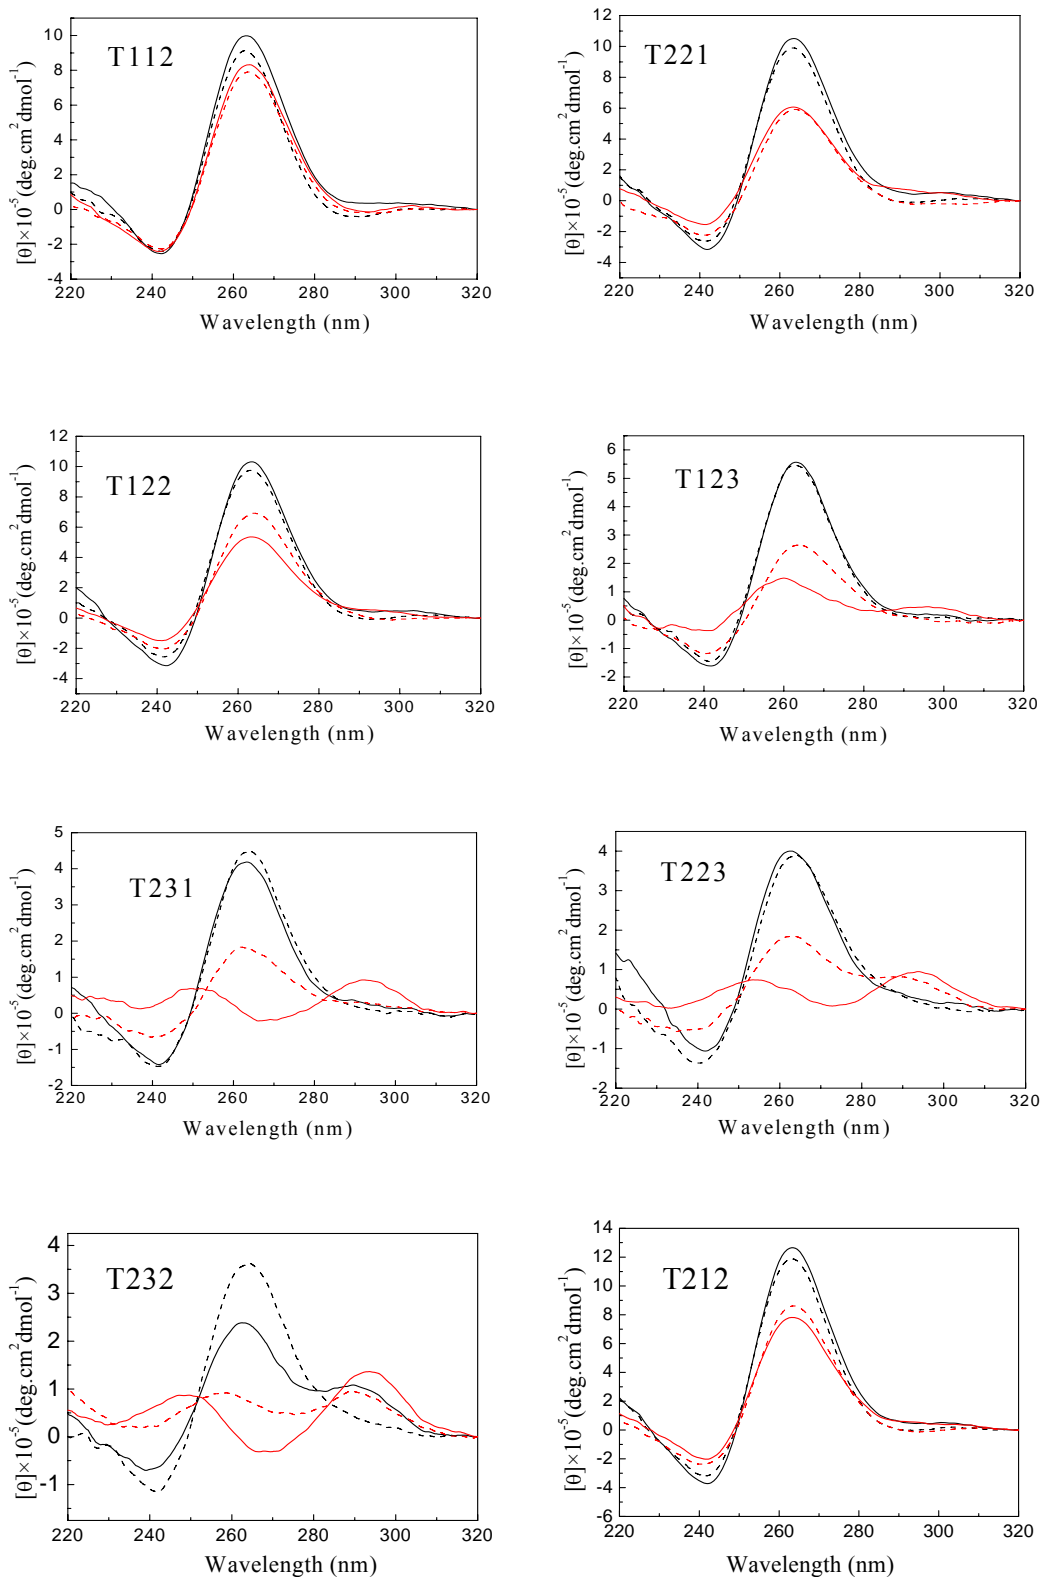

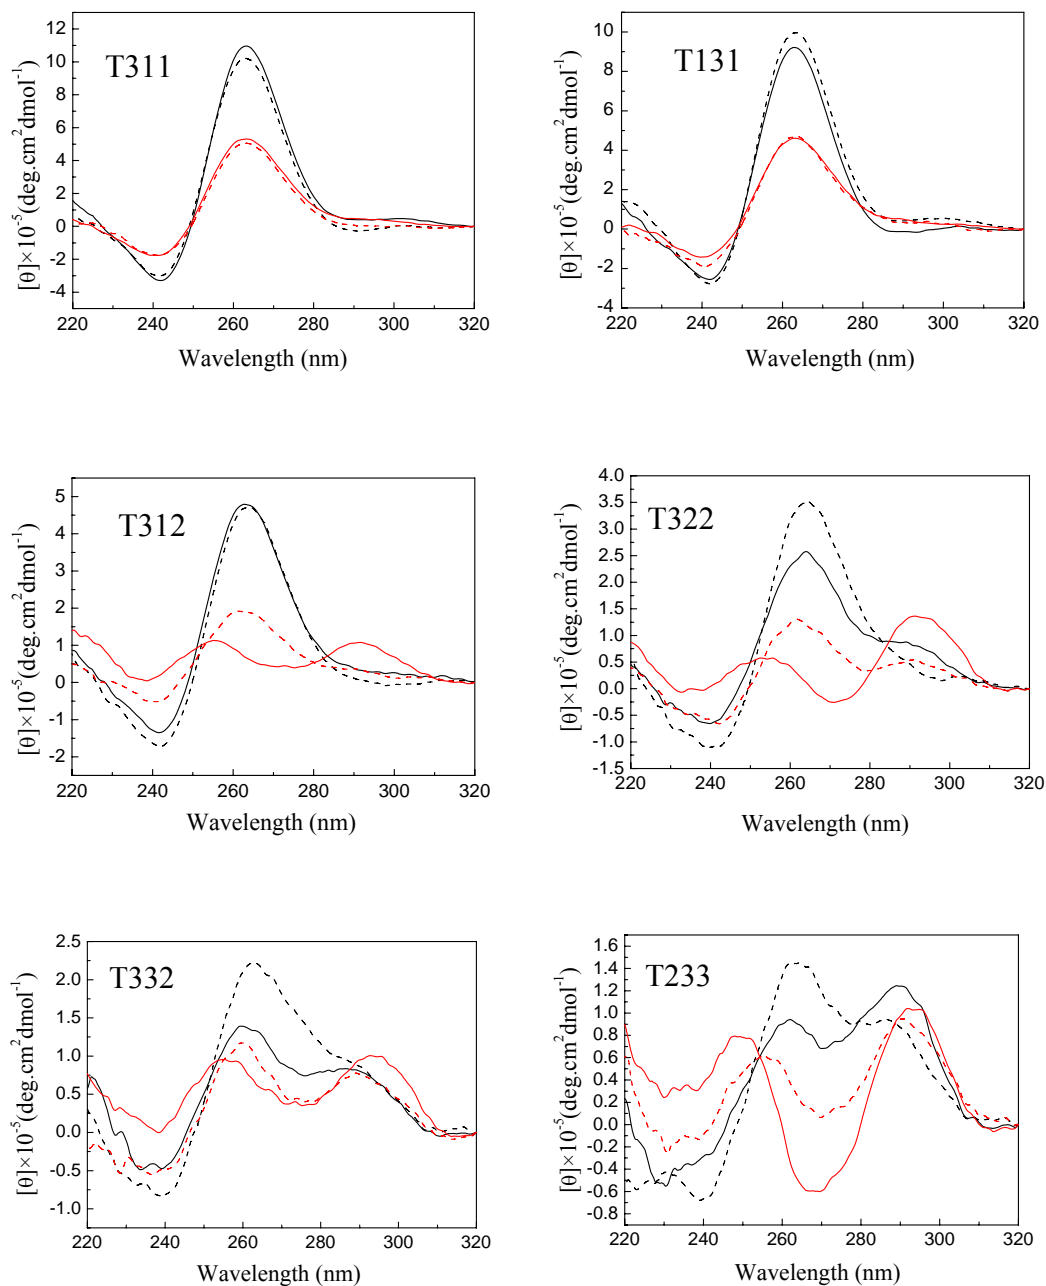

**Fig. S3** CD spectra of the oligonucleotides with the sequence of  $dG_3T_iG_3T_jG_3T_kG_3$  in the absence (solid lines) or presence (dotted lines) of hemin. The CD spectra were recorded in the presence of 100 mM  $K^+$  (black lines) or 100 mM  $Na^+$  (red lines).

#### 4. Structure and peroxidase activity of the oligonucleotides with the sequence of $dG_3T_iG_3T_jG_3T_kG_3$

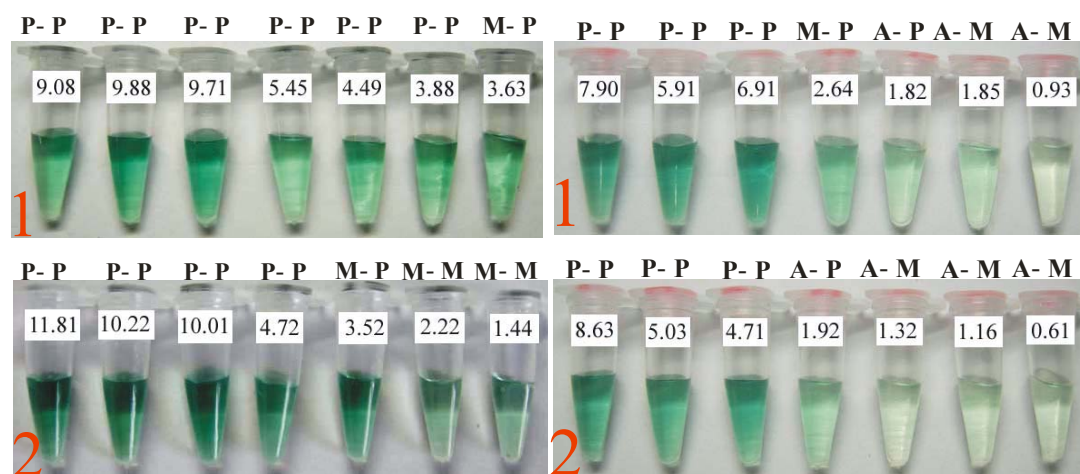

**Fig. S4** Oxidation of ABTS by  $H_2O_2$  in the presence of hemin and the oligonucleotides with the sequence of  $dG_3T_iG_3T_jG_3T_kG_3$ . The experiments were conducted in the presence of 100 mM  $K^+$  (left 1 and 2) or 100 mM  $Na^+$  (right 1 and 2). The letters on the top of each figure represent the G-quadruplex conformations in the absence (in the front of the short lines) or presence (behind the short lines) of hemin. The letters “P”, “A” and “M” represent parallel, antiparallel and parallel/antiparallel mixture, respectively. The data in the figures represent the CD signal intensities of the oligonucleotides in the presence of hemin. The oligonucleotides are (left to right): T112, T221, T122, T123, T231, T223, T232 (left 1 and right 1); T212, T311, T131, T312, T322, T332, T233 (left 2 and right 2).

## 5. Absorbance signal versus $K^+$ concentration plots

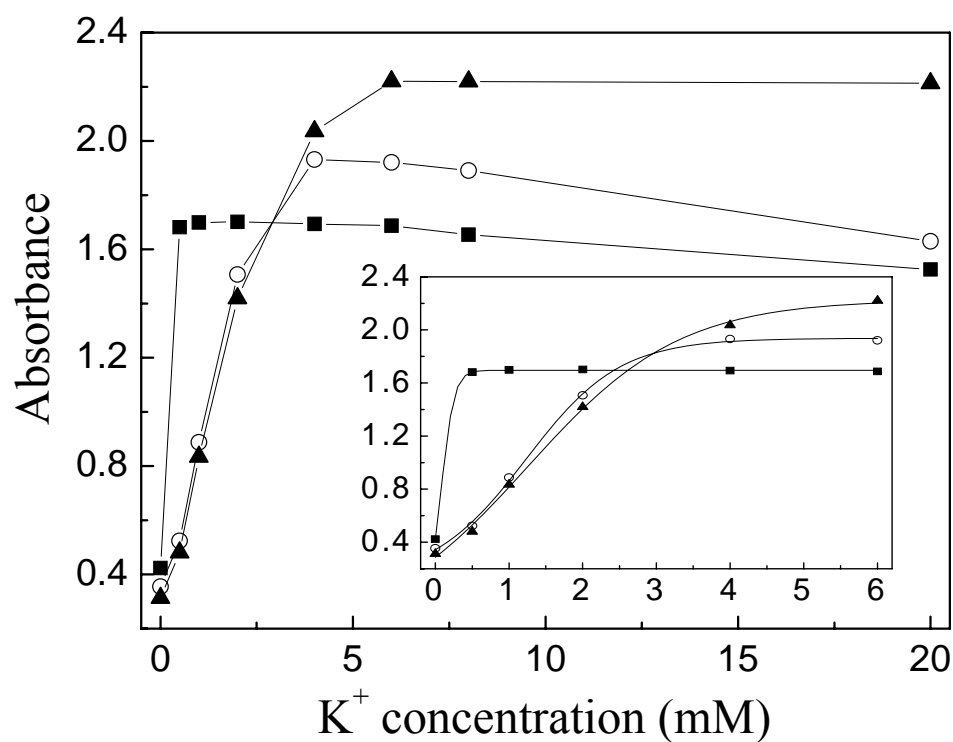

**Fig. S5** Absorbance signal at 414 nm versus  $K^+$  concentration plots for the oxidative reaction of ABTS by  $H_2O_2$ . The concentration of  $Na^+$ : 0 (■), 100 (○) and 300 mM (▲). The inserts show the normalized optical density versus  $K^+$  concentration plots at low  $K^+$  concentration ranges. The solid lines in the inserts represent nonlinear least-squares fit to the data. In this experiment, the oligonucleotide of T223 was used.
